# Supplementary material for: A Scatter-Based Prototype Framework and Multi-Class Extension of Support Vector Machines
Source: PubMed Central journal article supplement (PMC3484157; doi:10.1371/journal.pone.0042947), 2012-10-30
Supplement: pone.0042947.s001.pdf [file pone.0042947.s001.pdf]

## Appendix S1: Primal Optimization Problem and Dualization

The function  $s(f, \mathbf{x}, y)$  provides a comparative measure between the scoring function  $f_y(\mathbf{x})$  and  $f_{c \neq y}(\mathbf{x})$  as input to the loss function, commonly defined in the literature as

$$s(f, \mathbf{x}, y) = f_y(\mathbf{x}) - \operatorname{argmax}_{c \neq y} f_c(\mathbf{x}). \quad (1)$$

Because of the reference to the maximum of the scoring functions  $f_{c \neq y}(\mathbf{x})$ , a large number of constraints is introduced into the optimization problem. Much research has been aimed at solving Eq. (1) more efficiently, e.g. based on decomposition into smaller subproblems [1], interleaving column generation [2] or bundle methods [3], to name a few. But the limiting factor that the *max* represents, still remains.

As a remedy to this issue, we propose as a different and novel requirement that a hypothesis should score better than an *average* hypothesis, that is

$$s(f, \mathbf{x}, y) = f_y(\mathbf{x}) - \frac{1}{C} \sum_{c=1}^C f_c(\mathbf{x}).$$

For upcoming derivations, we focus on affine-linear models of the form

$$f_c(\mathbf{x}) = \mathbf{w}_c^\top \psi(\mathbf{x}) + b_c. \quad (2)$$

As discussed earlier, the bias parameter  $b_c$  may be removed in the derivations, which is a mild restriction for the high dimensional space  $\mathcal{H}$  we consider. For the time being including the bias, the average hypothesis thus becomes  $\bar{f}(\mathbf{x}) = \bar{\mathbf{w}}^\top \mathbf{x} + \bar{b}$  and

$$s(f, \mathbf{x}, y) = (\mathbf{w}_y - \bar{\mathbf{w}})^\top \psi(\mathbf{x}) + b_y - \bar{b}, \quad (3)$$

where  $\bar{\mathbf{w}} = \frac{1}{C} \sum_{c=1}^C \mathbf{w}_c$  and  $\bar{b} = \frac{1}{C} \sum_{c=1}^C b_c$ . Each hyperplane  $\mathbf{w}_c - \bar{\mathbf{w}}$ ,  $c = 1, \dots, C$ , is associated with a margin  $\rho$ . The following quadratic regularizer aims to penalize the norms of these hyperplanes while at the same time maximizing the margins

$$\Omega(f) = \frac{1}{2} \sum_c \|\mathbf{w}_c - \bar{\mathbf{w}}\|^2 - C\rho. \quad (4)$$

The regularized risk thus becomes

$$\frac{1}{2} \sum_{c=1}^C \|\mathbf{w}_c - \bar{\mathbf{w}}\|^2 - C\rho + \mu \sum_i l[(\mathbf{w}_{y_i} - \bar{\mathbf{w}})^\top \psi(\mathbf{x}_i) + b_{y_i} - \bar{b}].$$

Expanding the loss terms into slack variables leads to the *primal optimization problem*

$$\begin{aligned} \min_{\mathbf{w}_c, \mathbf{w}, b, \rho, \mathbf{t}} \quad & \frac{1}{2} \sum_c \|\mathbf{w}_c - \bar{\mathbf{w}}\|^2 - C\rho + \mu \sum_i l(t_i) \\ \text{s.t.} \quad & \langle \mathbf{w}_{y_i} - \bar{\mathbf{w}}, \psi(\mathbf{x}_i) \rangle + b_{y_i} \geq \rho - t_i, \quad \forall i \\ & \bar{\mathbf{w}} = \frac{1}{C} \sum_{c=1}^C \mathbf{w}_c \\ & \bar{b} = \frac{1}{C} \sum_{c=1}^C b_c = 0. \end{aligned} \quad (5)$$

The condition  $\bar{b} = 0$  is necessary in order to obtain the primal of the binary  $\mu$ -SVM as a special case of Eq. (5) and to avoid the trivial solution  $\mathbf{w}_c = \bar{\mathbf{w}} = \mathbf{0}$  with  $b_c = \rho \rightarrow \infty$ .

The optimization problem Eq. (5) has an interesting interpretation. The constraint may be written as

$$\mathbf{w}_{y_i}^\top \psi(\mathbf{x}_i) + b_{y_i} \geq \bar{\mathbf{w}}^\top \psi(\mathbf{x}_i) + \rho - t_i.$$

Hence, we are learning for each class label a hyperplane function  $f_{y_i}(\mathbf{x}) = \mathbf{w}_{y_i}^\top \psi(\mathbf{x}_i) + b_{y_i}$  that allows for scores better than the *average* by a margin. This is illustrated in Fig. 5 in the main manuscript.

## Dualization

Optimization is often considerably easier in the dual space. As it will turn out, we can derive the dual problem of Eq. (5) without knowing the loss function  $l$ , instead it is sufficient to work with the Fenchel-Legendre dual  $l^*(x) = \sup_t xt - l(t)$  (e.g. cf. [4, 5]). Applying Lagrange's theorem incorporates the constraints into the objective by introducing non-negative Lagrangian multipliers  $\boldsymbol{\alpha}, \boldsymbol{\beta}, \gamma$ ,

$$\begin{aligned} \mathcal{L} = & \frac{1}{2} \sum_c \|\mathbf{w}_c - \bar{\mathbf{w}}\|^2 - C\rho + \mu \sum_i l(t_i) \\ & - \sum_i \alpha_i (\langle \mathbf{w}_{y_i} - \bar{\mathbf{w}}, \psi(\mathbf{x}_i) \rangle + b_{y_i} - \rho - t_i) \\ & + \left\langle \boldsymbol{\beta}, \frac{1}{C} \sum_c \mathbf{w}_c - \bar{\mathbf{w}} \right\rangle + \gamma \sum_c b_c. \end{aligned}$$

Setting the partial derivatives of  $\mathcal{L}$  wrt. the dual variables to zero gives the following optimality conditions,

$$\forall c: \mathbf{w}_c - \bar{\mathbf{w}} = \sum_{i:y_i=c} \alpha_i \psi(\mathbf{x}_i) - \frac{1}{C} \boldsymbol{\beta}; \quad \mathbf{1}^\top \boldsymbol{\alpha}_c = 1,$$

where  $\boldsymbol{\alpha} = (\boldsymbol{\alpha}_1^\top, \dots, \boldsymbol{\alpha}_C^\top)^\top \in \mathbb{R}^n$  is equipped with a block structure and where  $\boldsymbol{\alpha}_c^\top \mathbf{1} = \sum_{i:y_i=c} \alpha_i$ . Note that the total number of variables in  $\boldsymbol{\alpha}$  is thus  $n$ . Resubstituting into the Lagrangian and subsequently solving for  $\frac{\partial \mathcal{L}}{\partial \boldsymbol{\beta}} = 0$  leads to

$$\begin{aligned} \forall c: \mathbf{w}_c &= \sum_{i:y_i=c} \alpha_i \psi(\mathbf{x}_i) \\ \bar{\mathbf{w}} &= \frac{1}{C} \sum_i \alpha_i \psi(\mathbf{x}_i); \quad \boldsymbol{\beta} = \sum_i \alpha_i \mathbf{x}_i. \end{aligned} \tag{6}$$

By the latter equations the Lagrangian saddle point problem can be expressed as

$$\sup_{\boldsymbol{\alpha}} \inf_t - \frac{1}{2} \boldsymbol{\alpha}^\top \boldsymbol{\mathcal{K}} \boldsymbol{\alpha} + \mu \sum_i (l(t_i) + \alpha_i t_i), \tag{7}$$

$\boldsymbol{\alpha}: \boldsymbol{\alpha}^\top \mathbf{1} = C, \boldsymbol{\alpha}_c^\top \mathbf{1} = 1, c = 1, \dots, C$  (if bias) where  $\boldsymbol{\mathcal{K}}$  is given by Eq. (7) in the main manuscript. Inserting the notion of a Fenchel-Legendre dual function we can completely remove the dependency on the primal variables in Eq. (7), and obtain the generalized dual problem

$$\sup_{\boldsymbol{\alpha}} - \frac{1}{2} \boldsymbol{\alpha}^\top \boldsymbol{\mathcal{K}} \boldsymbol{\alpha} - \mu \sum_i l^*(-\mu^{-1} \alpha_i), \tag{8}$$

$\boldsymbol{\alpha}: \boldsymbol{\alpha}^\top \mathbf{1} = C, \boldsymbol{\alpha}_c^\top \mathbf{1} = 1, c = 1, \dots, C$  (if bias) where  $l^*$  is the Fenchel-Legendre conjugate function, which we subsequently denote as *dual loss* of  $l$ .

## References

1. Crammer K, Singer Y (2001) On the Algorithmic Implementation of Multiclass Kernel-based Vector Machines. *Journal of Machine Learning Research* 2: 265-292.
2. Joachims T, Finley T, Yu CN (2009) Cutting-Plane Training of Structural SVMs. *Machine Learning* 77: 27-59.

3. Teo CH, Vishwanathan S, Smola A, Le Q (2010) Bundle Methods for Regularized Risk Minimization. *Journal of Machine Learning Research* 11: 311-365.
4. Boyd S, Vandenberghe L (2004) *Convex Optimization*. Cambridge, UK: Cambridge University Press.
5. Smola AJ, Vishwanathan SVN, Le Q (2008) Bundle Methods for Machine Learning. In: *Advances in Neural Information Processing Systems* 20.
