# Supplementary material for: A Scatter-Based Prototype Framework and Multi-Class Extension of Support Vector Machines
Source: PubMed Central journal article supplement (PMC3484157; doi:10.1371/journal.pone.0042947), 2012-10-30
Supplement: pone.0042947.s002.pdf [file pone.0042947.s002.pdf]

## Appendix S2: Shogun Implementation and Algorithm

To describe the with-bias algorithm, we start from the 2-class  $\nu$ -formulation as stated in Eq. (28) in [1] and repeated here

$$\begin{aligned} \inf_{\alpha'} \quad & \frac{1}{2} \alpha'^{\top} \mathcal{K} \alpha' \\ \text{s.t.} \quad & \mathbf{y}^{\top} \alpha' = 0, \quad \alpha'^{\top} \mathbf{1} = \nu, \quad \mathbf{0} \leq \alpha' \leq \frac{1}{N} \mathbf{1}. \end{aligned}$$

We first notice that the two equality constraints can be expressed by class-wise total weight mass conditions:  $\alpha'_1{}^{\top} \mathbf{1} = \alpha'_{-1}{}^{\top} \mathbf{1} = \nu/2$ . Due to these equality constraints, reasonable subproblems require  $y_i = y_j$ ; otherwise, neither  $\alpha'_i$  nor  $\alpha'_j$  could be changed. Consequently this constraint is implemented by the selection strategy and a proper choice of the initial solution candidate. Note that feasible initial points also require  $\nu \leq C \cdot N_{min}/N$ . To recover the problem in Eq. (15) in the main manuscript, we need to perform a variable transformation  $\alpha' \mapsto \frac{\alpha}{\mu \cdot N}$  combined with the choice  $\nu = C/(\mu \cdot N)$ .

For 2-class problems, LIBSVM's working set selection strategy for  $\nu$ -SVMs (cf. WSS 5 in [1]) traverses the active set twice and thus requires an effort of  $\mathcal{O}(2N + 2T)$ , where  $T$  is the time to compute a kernel row. A straightforward generalization traverses the active set for each of the  $C$  classes leading to an effort of  $\mathcal{O}(CN + CT)$  which is what we used throughout experiments. However, when ordering examples, such that  $y_i \leq y_j$  for  $i < j$  and by creating  $C$  arrays to hold the maximum class-wise gradient etc. the computational complexity can be further reduced to  $\mathcal{O}(C + N + CT)$ .

We now describe our without-bias algorithm. We now face the problem that due to the lack of a bias there is no sum-to-one constraint on the  $\alpha_i$ 's anymore in the dual optimization problem, Eq. (15) in the main manuscript. Therefore the line search performed by SMO cannot be solved analytically anymore. As a remedy we implemented a without-bias solver based on SVMlight, which basically can deal with any quadratic program. The algorithm is described in Algorithm 1. We thereby employ the notation  $\mathcal{K} = \kappa(\mathbf{x}_i, \mathbf{x}_j)_{i,j=1}^n$  for the block kernel matrix as defined in Eq. (7) in the main manuscript.

The algorithm has as input an accuracy parameter  $\epsilon$  (in our experiments  $\epsilon = 0.001$  was chosen) and an active set size  $Q$  ( $Q = 40$  was chosen). The main FOR loop (Lines 2-3) iterates until the stopping criterion (duality gap less than  $\epsilon$ ) is fulfilled. Line (a) computes the set of  $Q$  active variables based on minimal gradients. Line (b) performs the actual Scatter SVM computation w.r.t. the active variables, resulting in new values of the  $\alpha_i$ . Line (c) updates the gradient w.r.t. the the new  $\alpha_i$ . Line (d) computes the actual objective value of the optimization problem, Eq. (15) in the main manuscript.

### Algorithm 1

1.  $S^0 = -\infty$ ,  $g_i = 0$ ,  $\alpha_i = 0$ ,  $\forall i = 1, \dots, n$
2. **for**  $t = 1, 2, \dots$  and while optimality conditions are not satisfied, i.e.  $|1 - \frac{S^t}{S^{t-1}}| \geq \epsilon$ 
  - (a) Select  $Q$  variables  $\alpha_{i_1}, \dots, \alpha_{i_Q}$  based on the gradient  $\mathbf{g}$  of Eq. (15) in the main manuscript, w.r.t.  $\alpha$
  - (b) Store  $\alpha^{old} = \alpha$  and then update  $\alpha$  according to Eq. (15) in the main manuscript, with respect to the selected variables
  - (c) Update gradient  $g_i \leftarrow g_i + \sum_{q=1}^Q (\alpha_{i_q} - \alpha_{i_q}^{old}) y_{i_q} \kappa(\mathbf{x}_{i_q}, \mathbf{x}_i)$ ,  $\forall i = 1, \dots, n$
  - (d) Compute the SVM objective  $S^t = \sum_i y_i \alpha_i - \frac{1}{2} \sum_i y_i g_{m,i} \alpha_i$
3. **end for**

## References

1. Fan RE, Chen PH, Lin CJ (2005) Working Set Selection Using the Second Order Information for Training SVM. *Journal of Machine Learning Research* 6: 1889–1918.
